# Supplementary material for: Three novel organosilver(I) coordination networks constructed from diallylmelamine and polycarboxylates incorporating silver-vinyl bonding
Source: Royal Society of Chemistry journal article supplement (doi:10.1039/c1dt11866h), 2011-12-19

## *Supporting Information for Dalton Transactions*

### **Three novel organosilver(I) coordination networks constructed from diallylmelamine and polycarboxylates incorporating silver-vinyl bonding**

**Yun-Hua Li,<sup>a,‡</sup> Di Sun,<sup>\*b,‡</sup> Hong-Jun Hao,<sup>a</sup> Yang Zhao,<sup>a</sup> Rong-Bin Huang,<sup>\*a</sup> Lan-Sun Zheng<sup>a</sup>**

<sup>a</sup>*State Key Laboratory of Physical Chemistry of Solid Surface and Department of Chemistry, College of Chemistry and Chemical Engineering, Xiamen University, Xiamen, China.*

*E-mail: rbhuang@xmu.edu.cn; Fax: +86-592-2183047.*

<sup>b</sup>*School of Chemistry and Chemical Engineering, Shandong University, Jinan, Shandong, 250100, China.*

*E-mail: dsun@sdu.edu.cn; Fax: +86-531-88364218.*

*‡These authors contributed equally to this work.*

|                                                                                                |   |
|------------------------------------------------------------------------------------------------|---|
| (1) Fig. S1: The strong $\pi \cdots \pi$ interactions between triazinyl and phenyl rings. .... | 2 |
| (2) Fig. S2: The 3D supramolecular framework of 1. ....                                        | 3 |
| (3) Fig. S3: 2D supramolecular sheet of 2 containing $R_4^2(8)$ motifs. ....                   | 4 |
| (4) Table S1: The hydrogen bond geometries for 1-3. ....                                       | 5 |
| (5) Fig. S4: PXRD of 1-3. ....                                                                 | 6 |
| (6) Fig. S5: Emission spectrum of free dama ligand. ....                                       | 7 |
| (7) Fig. S6: IR spectra of 1-3. ....                                                           | 8 |

(1) Fig. S1: The strong  $\pi\cdots\pi$  interactions between triazinyl and phenyl rings.

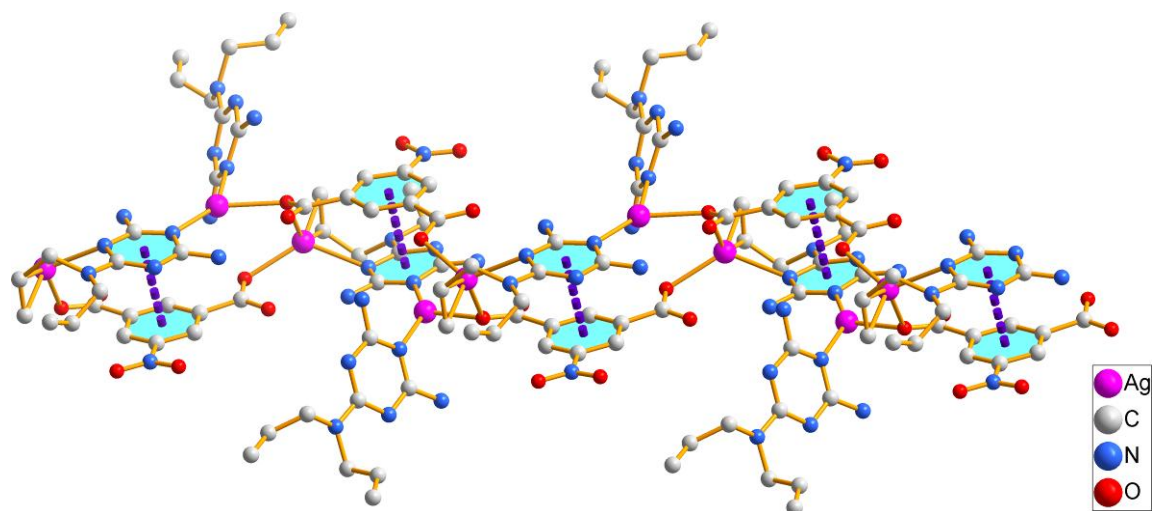

(2) Fig. S2: The 3D supramolecular framework of 1.

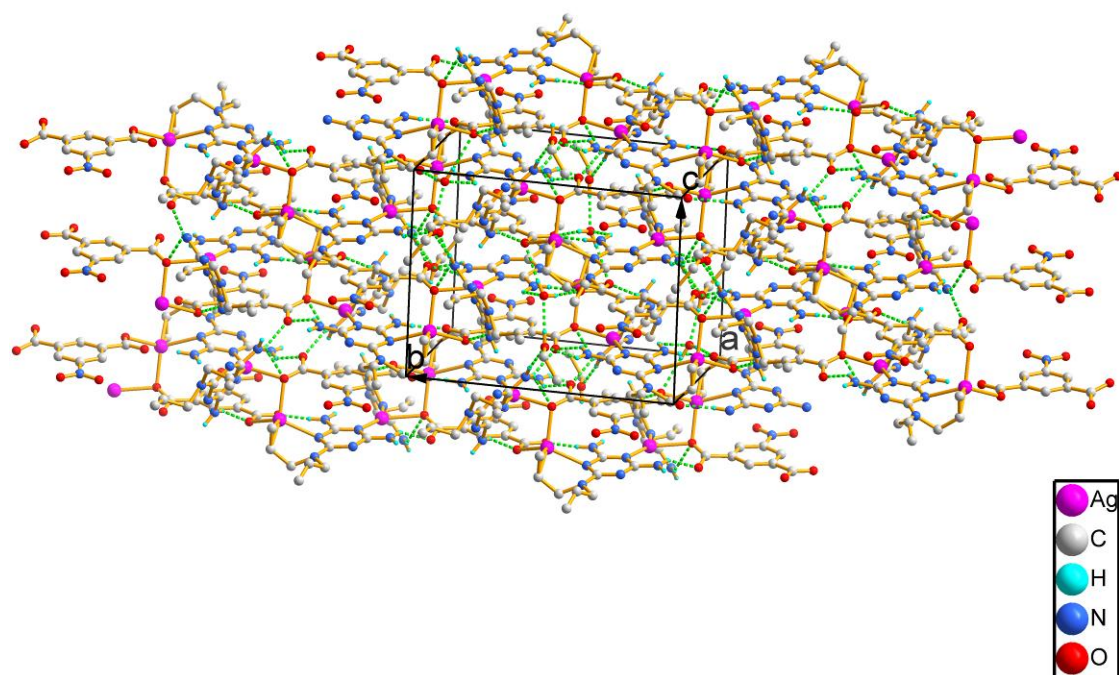

(3) Fig. S3: 2D supramolecular sheet of **2** containing  $R_4^2(8)$  motifs.

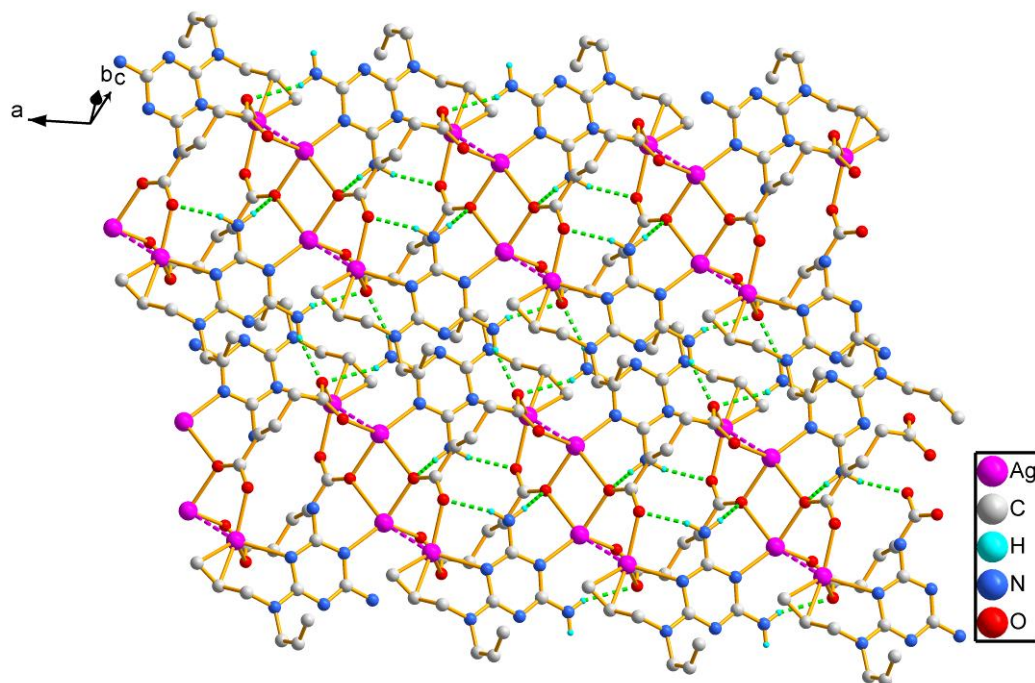

(4) Table S1: The hydrogen bond geometries for 1-3

| Complex 1                    |               |                       |                         |
|------------------------------|---------------|-----------------------|-------------------------|
| <i>D</i> —H... <i>A</i>      | H... <i>A</i> | <i>D</i> ... <i>A</i> | <i>D</i> —H... <i>A</i> |
| N4—H4A...O1W                 | 2.58          | 3.041 (5)             | 114                     |
| N4—H4B...O2                  | 1.96          | 2.808 (5)             | 161                     |
| N5—H5A...O7                  | 2.14          | 2.902 (5)             | 145                     |
| N5—H5B...O3 <sup>iii</sup>   | 2.02          | 2.770 (5)             | 142                     |
| N10—H10A...O7 <sup>v</sup>   | 2.13          | 3.005 (5)             | 172                     |
| N10—H10B...O3 <sup>vi</sup>  | 2.06          | 2.728 (5)             | 132                     |
| N11—H11A...N9 <sup>vii</sup> | 2.42          | 3.201 (5)             | 149                     |
| N11—H11B...O1 <sup>iv</sup>  | 2.15          | 2.925 (5)             | 147                     |
| O1W—H1WA...O2                | 2.02          | 2.863 (5)             | 173                     |
| O1W—H1WB...O1 <sup>v</sup>   | 2.28          | 3.126 (5)             | 173                     |
| O7—H7D...O1W <sup>i</sup>    | 2.05          | 2.878 (4)             | 170                     |

Symmetry codes: (i)  $-x+1, y+1/2, -z+1/2$ . (iii)  $x, y+1, z$ ; (v)  $-x+1, -y+1, -z+1$ ; (vi)  $-x+1, -y, -z+1$ ; (vii)  $x, -y-1/2, z-1/2$ ; (iv)  $-x+1, y-1/2, -z+1/2$ ;

| Complex 2                 |               |                       |                         |
|---------------------------|---------------|-----------------------|-------------------------|
| <i>D</i> —H... <i>A</i>   | H... <i>A</i> | <i>D</i> ... <i>A</i> | <i>D</i> —H... <i>A</i> |
| N4—H4A...O1               | 2.10          | 2.847 (4)             | 145                     |
| N4—H4B...O2 <sup>i</sup>  | 2.35          | 3.060 (4)             | 140                     |
| N5—H5A...O4 <sup>iv</sup> | 2.12          | 2.945 (4)             | 159                     |
| N5—H5B...O4 <sup>v</sup>  | 2.33          | 3.100 (4)             | 150                     |

Symmetry codes: (i)  $-x+1, -y, -z$ ; (iv)  $x+1, y+1, z+1$ ; (v)  $-x+2, -y, -z$ .

| Complex 3                    |               |                       |                         |
|------------------------------|---------------|-----------------------|-------------------------|
| <i>D</i> —H... <i>A</i>      | H... <i>A</i> | <i>D</i> ... <i>A</i> | <i>D</i> —H... <i>A</i> |
| N4—H4C...O1W <sup>i</sup>    | 2.12          | 3.022 (5)             | 165                     |
| N4—H4D...O6 <sup>i</sup>     | 2.03          | 2.795 (4)             | 140                     |
| N5—H5B...O1W <sup>ii</sup>   | 2.14          | 3.014 (4)             | 171                     |
| N5—H5C...O1 <sup>ii</sup>    | 2.11          | 2.990 (5)             | 174                     |
| N10—H10A...O4 <sup>iii</sup> | 2.10          | 2.750 (4)             | 128                     |
| N10—H10B...O7 <sup>iv</sup>  | 2.28          | 2.906 (5)             | 126                     |
| N11—H11A...O2W <sup>v</sup>  | 2.38          | 3.139 (5)             | 144                     |
| N11—H11B...O8 <sup>vi</sup>  | 2.12          | 2.984 (4)             | 168                     |
| O1W—H1WA...O2W               | 2.00          | 2.835 (4)             | 169                     |
| O1W—H1WB...O2 <sup>i</sup>   | 1.95          | 2.743 (4)             | 155                     |
| O2W—H2WA...N9 <sup>v</sup>   | 2.06          | 2.885 (5)             | 163                     |
| O2W—H2WB...O7 <sup>v</sup>   | 1.97          | 2.773 (4)             | 158                     |

Symmetry codes: (i)  $-x+1, -y+1, -z+1$ ; (ii)  $-x, -y+1, -z+1$ ; (iii)  $-x+1, -y, -z+2$ ; (iv)  $x-1, y, z$ ; (v)  $-x+2, -y, -z+1$ ; (vi)  $-x+2, -y, -z+2$ .

(5) Fig. S4: PXRD of 1-3

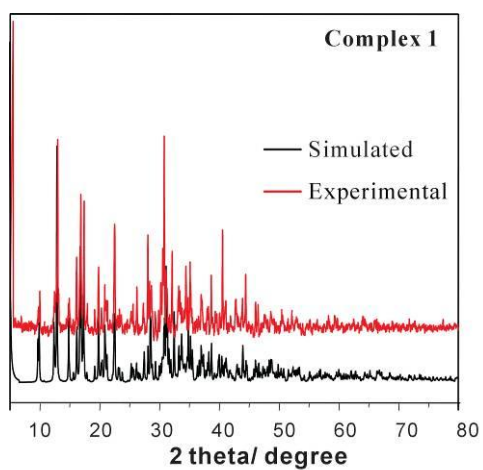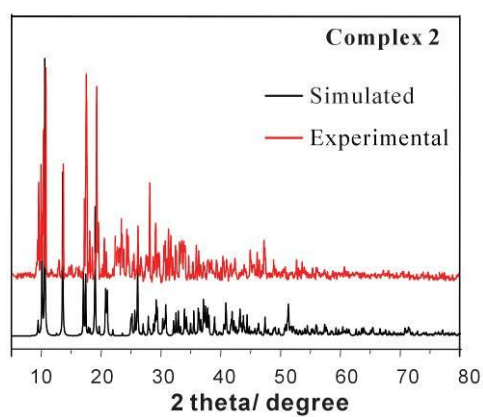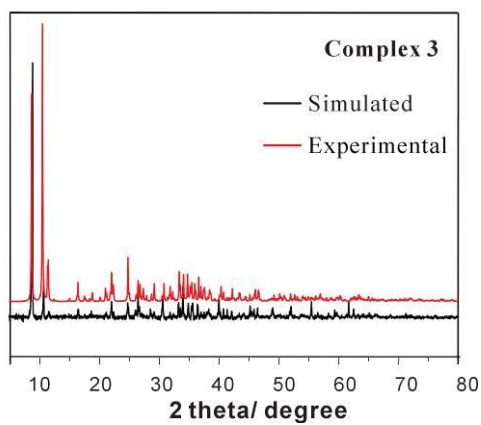

(6) Fig. S5: Emission spectrum of free dama ligand

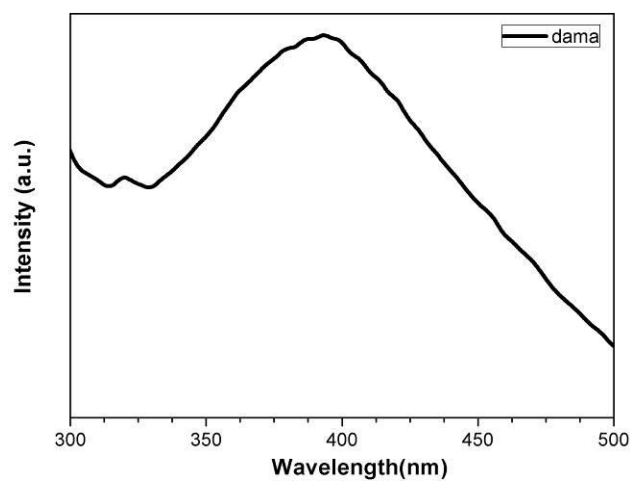

(7) Fig. S6: IR spectra of 1-3

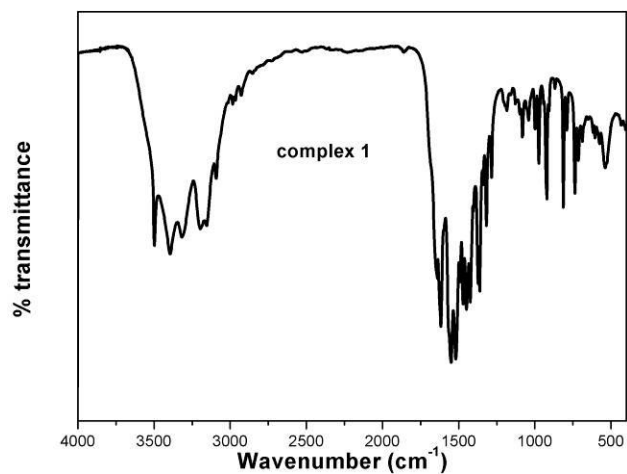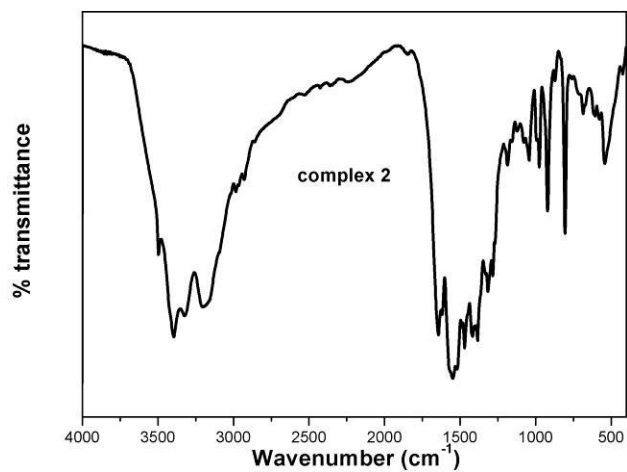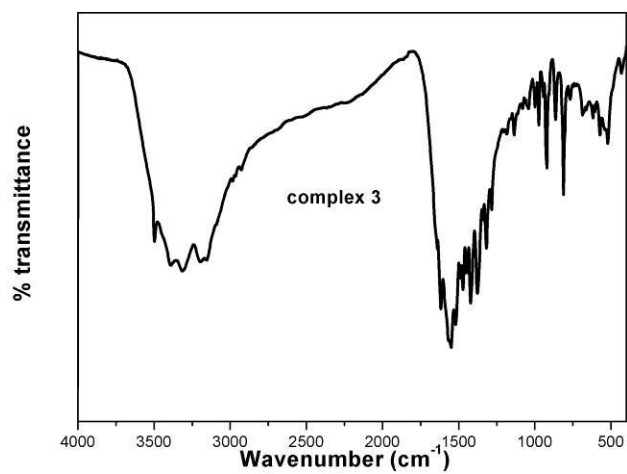

Supplement: c1dt11866h.pdf [file c1dt11866h.pdf]
